# Supplementary material for: Fabrication of a PANI/CPs composite material: a feasible method to enhance the photocatalytic activity of coordination polymers
Source: Royal Society of Chemistry journal article supplement (doi:10.1039/c2dt32636a), 2013-01-01
Supplement: c2dt32636a.pdf [file c2dt32636a.pdf]

## **Electronic Supplementary Information (ESI)**

### **Fabrication of PANI/CPs composite material: a feasible method to enhance the photocatalytic activity of coordination polymer**

**Xin-Xin Xu, Zhong-Ping Cui, Ji Qi and Xiao-Xia Liu\***

*Department of Chemistry, College of Science, Northeast University, Shenyang,*

*Liaoning, 110819, People's Republic of China*

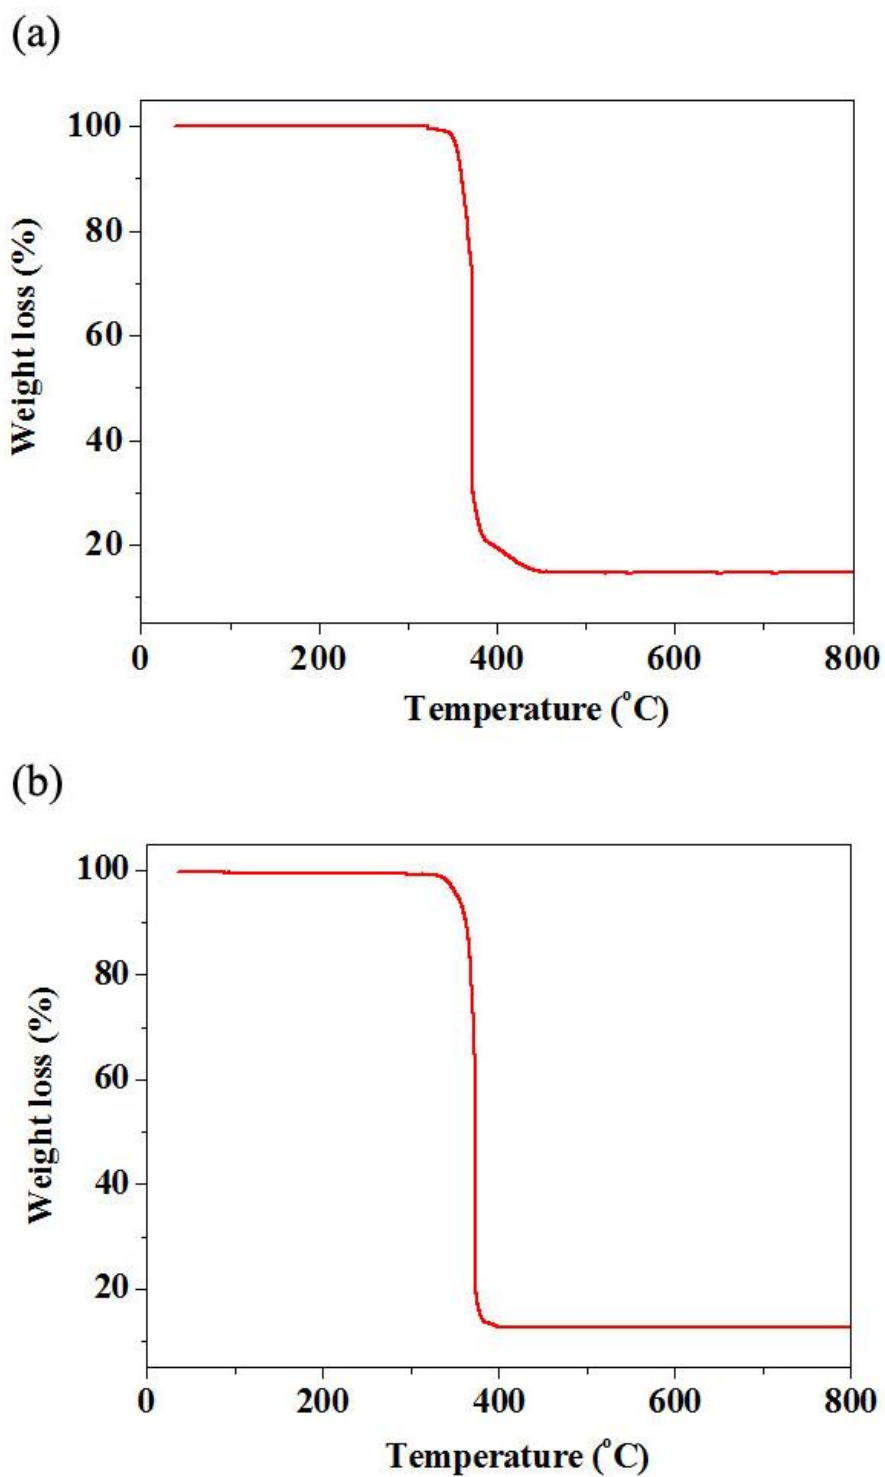

Figure S1 (a) TGA of **CP1**, (b) TGA of **CP1a**.

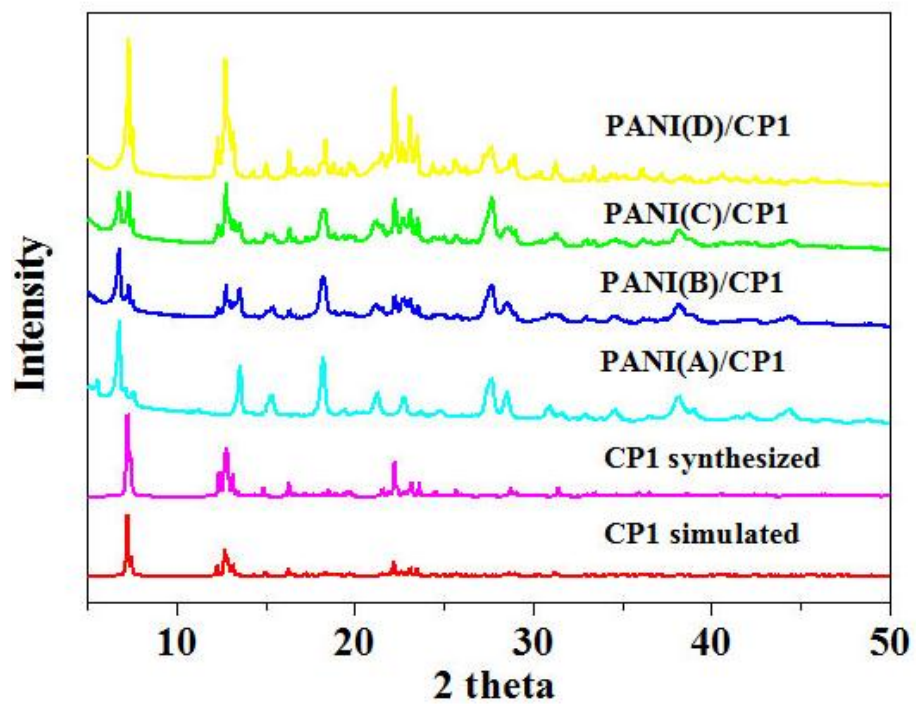

Figure S2 PXR D of CP1 and PANI/CP1 composite materials.

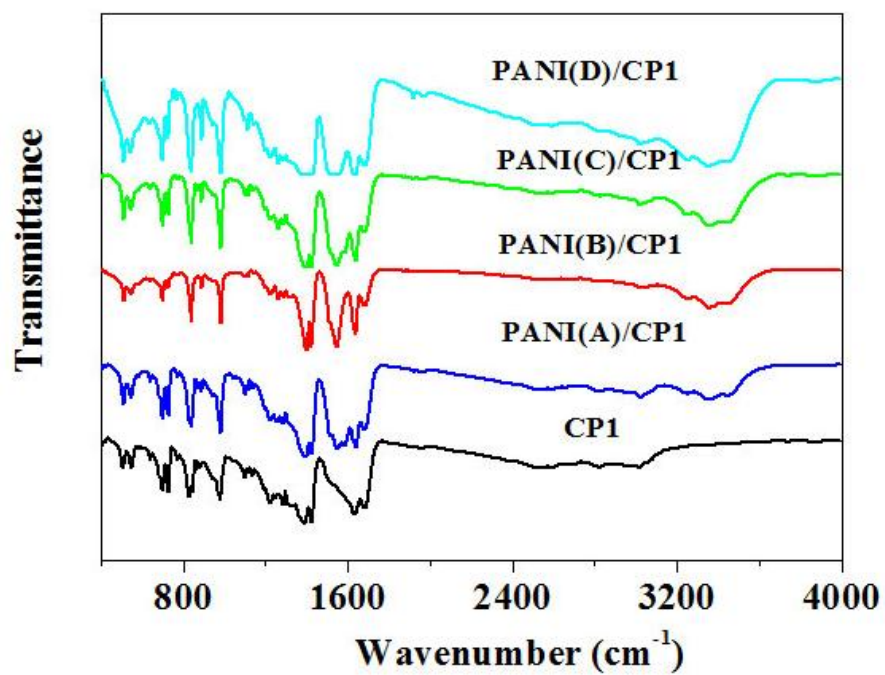

Figure S3 IR spectra of CP1 and PANI/CP1 composite materials.

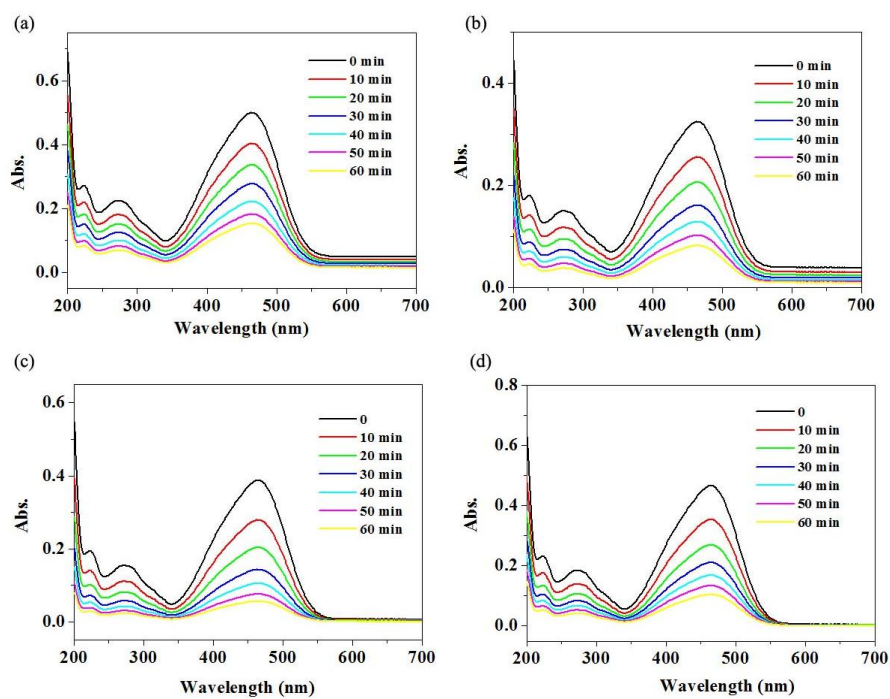

Figure S4 UV-Vis absorption spectra of MO solution degraded by PANI for different time intervals under visible light: (a) PANI flake; (b) PANI rod; (c) PANI fiber; (d) PANI mesh.

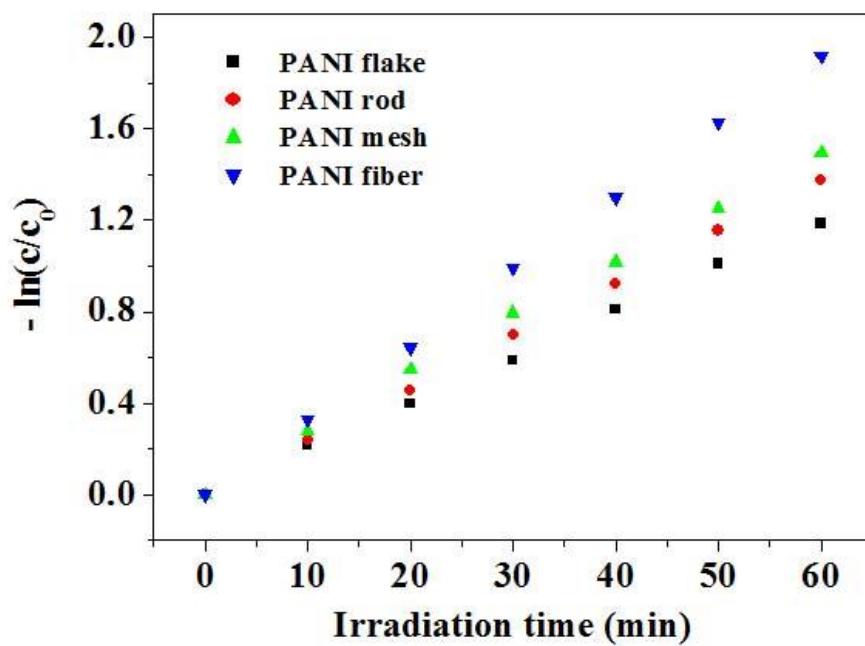

Figure S5 Curves of degradation rate for MO by different **PANI** as the function of irradiation time.
